# Supplementary material for: Effect of tryptophan residues on gold mineralization by a gold reducing peptide
Source: Royal Society of Chemistry journal article supplement (doi:10.1039/d0ra07098j), 2020-01-01
Supplement: d0ra07098j1.pdf [file d0ra07098j1.pdf]

**Supporting Information for**

**Effect of Tryptophan Residues on Gold Mineralization  
by a Gold Reducing Peptide**

***Makoto Ozaki, Shuhei Yoshida, Maho Oura, Takaaki Tsuruoka, and Kenji Usui\****

[\*] Dr. Kenji Usui, Mr. Makoto Ozaki, Mr. Shuhei Yoshida, Ms. Maho Oura, Dr. Takaaki Tsuruoka  
Faculty of Frontiers of Innovative Research in Science and Technology (FIRST),  
Konan University, 6500047, Kobe (Japan)  
E-mail: kusui@konan-u.ac.jp (K. Usui)

**CONTENTS:**

|           |                                                                                                                              |
|-----------|------------------------------------------------------------------------------------------------------------------------------|
| Page S2:  | Fig. S1 for CD spectra of AuBP1, 2W-AuBP1, and 3W-AuBP1.                                                                     |
| Page S3:  | Fig. S2 for growth of absorbance derived from SPR at 540 nm over time of each peptide                                        |
| Page S4:  | Fig. S3 for TEM images of the sample after gold mineralization using 100 $\mu$ M peptides                                    |
| Page S5:  | Fig. S4 for kinetic analysis of reduction of $\text{Au}^{3+}$ to $\text{Au}^0$ using 100 $\mu$ M 3W-AuBP1                    |
| Page S6:  | Fig. S5 for UV-VIS data of the sample after gold mineralization using various concentration peptides                         |
| Page S7:  | Fig. S6 for TEM images of the sample after gold mineralization using peptides of various concentrations                      |
| Page S8:  | Fig. S7 for TEM image and particle histogram of the commercial gold nanoparticle                                             |
| Page S9:  | Fig. S8 for catalytic activity data of reduction reaction of 4-nitrophenol with/without gold nanoparticles                   |
| Page S10: | Fig. S9 for Arrhenius plots of the sample using mineralized gold nanoparticles                                               |
| Page S11: | Fig. S10 for TEM images of mineralized gold nanospheres using 100 $\mu$ M peptides after reduction reaction of 4-nitrophenol |
| Page S12: | Fig. S11 for HPLC and MS for purified AuBP1, 2W-AuBP1, and 3W-AuBP1                                                          |

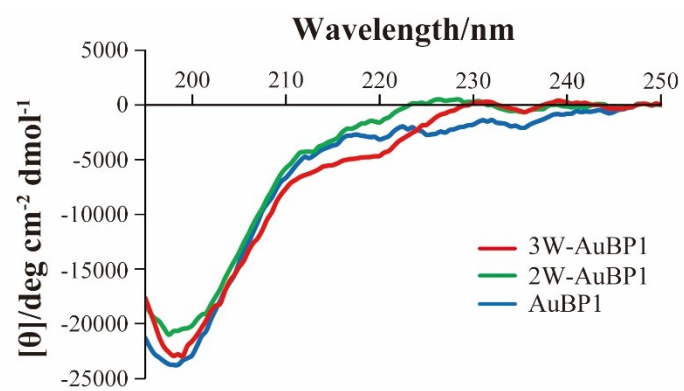

**Fig. S1** CD spectra of 10  $\mu\text{M}$  AuBP1, 2W-AuBP1, and 3W-AuBP1.

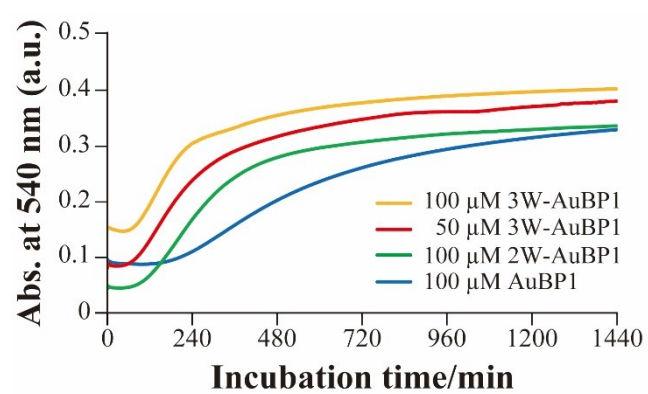

**Fig. S2** Growth of absorbance derived from SPR at 540 nm over time of each peptide.

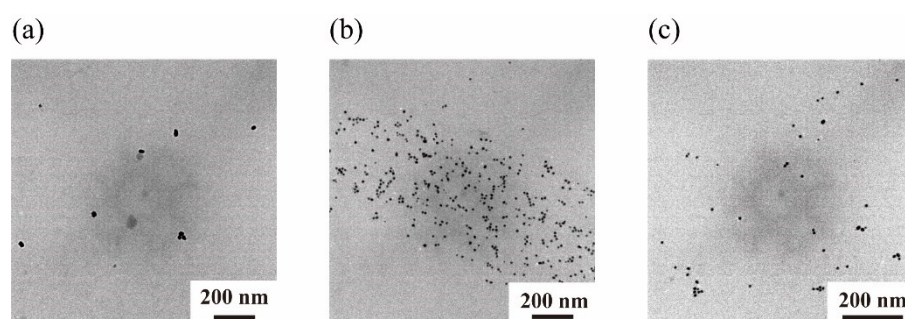

**Fig. S3** TEM images of the sample after gold mineralization using (a) 100  $\mu$ M AuBP1, (b) 100  $\mu$ M 2W-AuBP1, and (c) 100  $\mu$ M 3W-AuBP1.

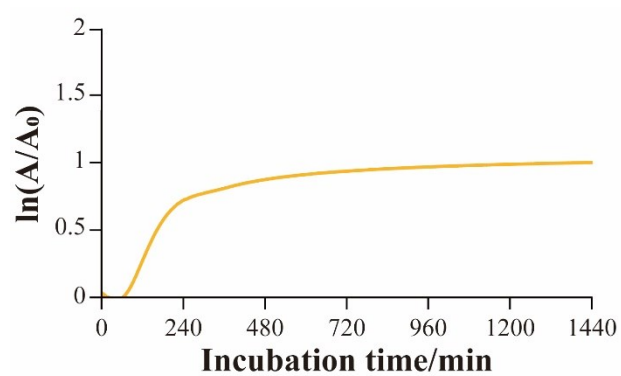

**Fig. S4** Pseudo-first-order kinetic analysis of the reduction of Au<sup>3+</sup> to Au<sup>0</sup> using 100  $\mu$ M 3W-AuBP1.

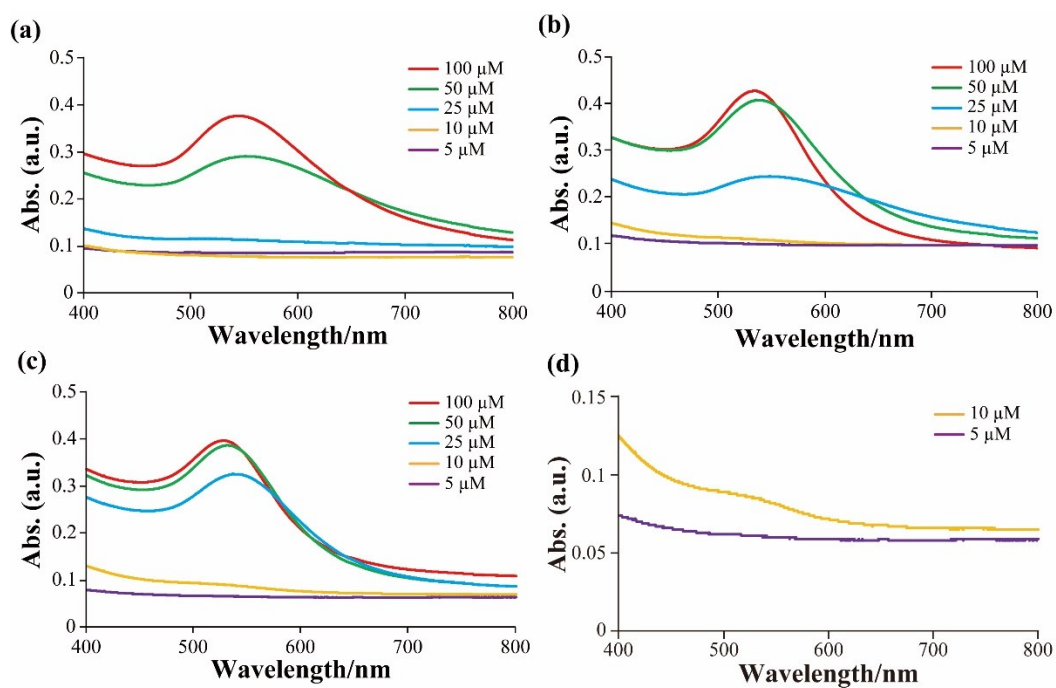

**Fig. S5** UV-VIS spectra of the sample after gold mineralization using (a) AuBP1, (b) 2W-AuBP1, and (c), (d) 3W-AuBP1.

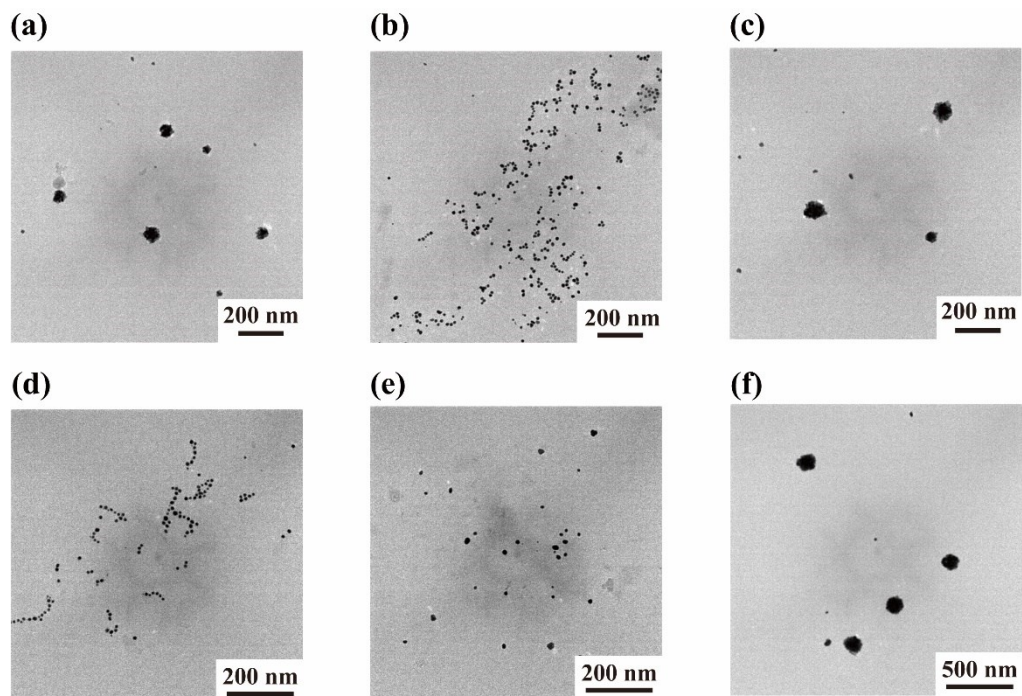

**Fig. S6** TEM images of the sample after gold mineralization using (a) 50  $\mu\text{M}$  AuBP1, (b) 50  $\mu\text{M}$  2W-AuBP1, (c) 25  $\mu\text{M}$  2W-AuBP1, (d) 50  $\mu\text{M}$  3W-AuBP1, (e) 25  $\mu\text{M}$  3W-AuBP1, and (f) 10  $\mu\text{M}$  3W-AuBP1.

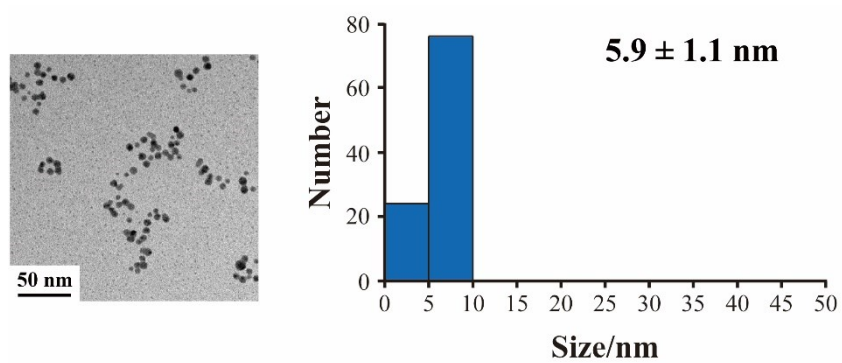

**Fig. S7** TEM image and particle histogram of the commercial gold nanoparticle (Sigma-Aldrich, 741949).



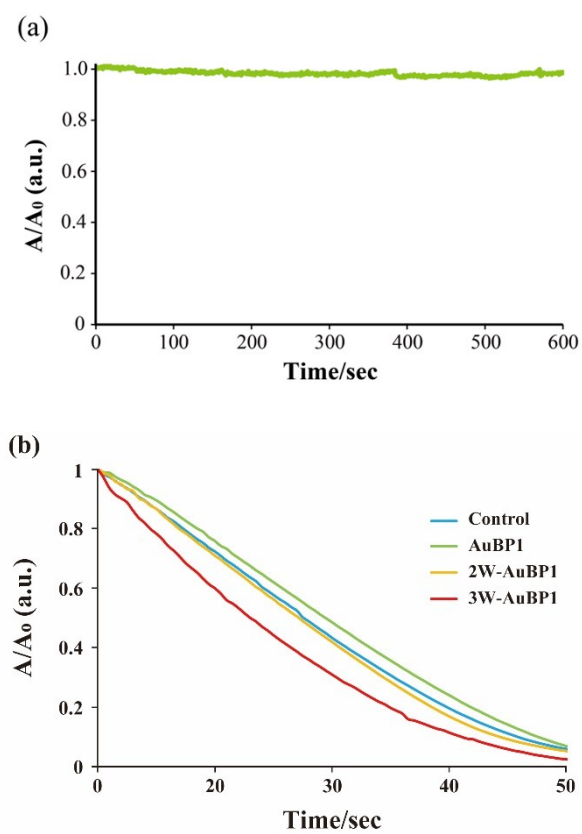

**Fig. S8** (a) Time course of reduction reaction of 4-nitrophenol to 4-aminophenol without gold nanoparticles at 20°C. (b) Time course of reduction reaction of 4-nitrophenol to 4-aminophenol using gold nanoparticles at 30°C.

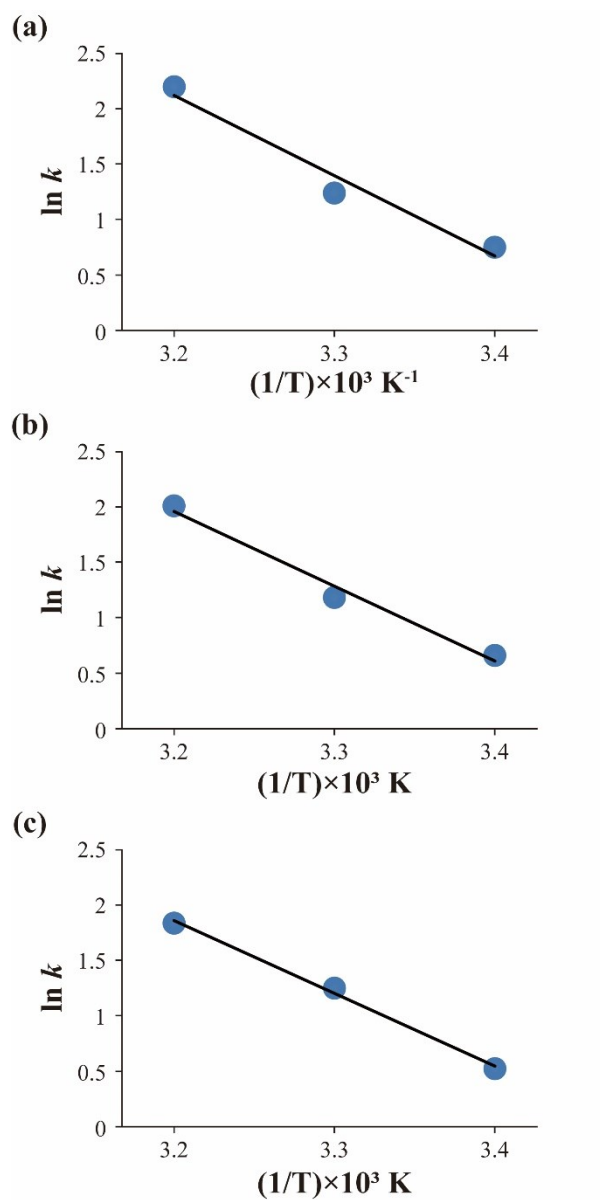

**Fig. S9** Arrhenius plots of reduction reaction of 4-nitrophenol using (a) AuBP1, (b) 2W-AuBP1, and (c) 3W-AuBP1.

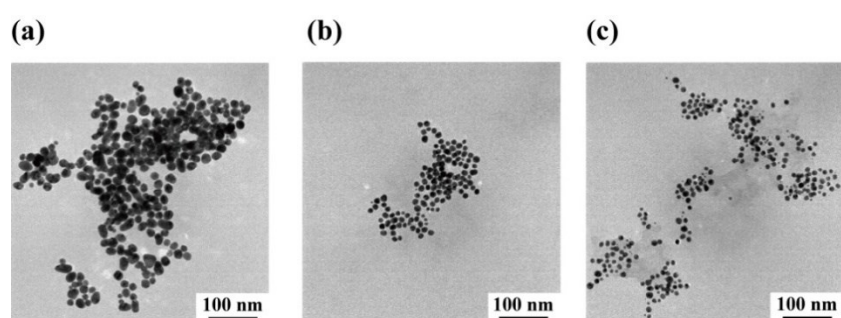

**Fig. S10** TEM images of mineralized gold nanospheres with (a) 100  $\mu\text{M}$  AuBP1, (b) 100  $\mu\text{M}$  2W-AuBP1, and (c) 100  $\mu\text{M}$  3W-AuBP1 after reduction reaction of 4-nitrophenol to 4-aminophenol is completed.

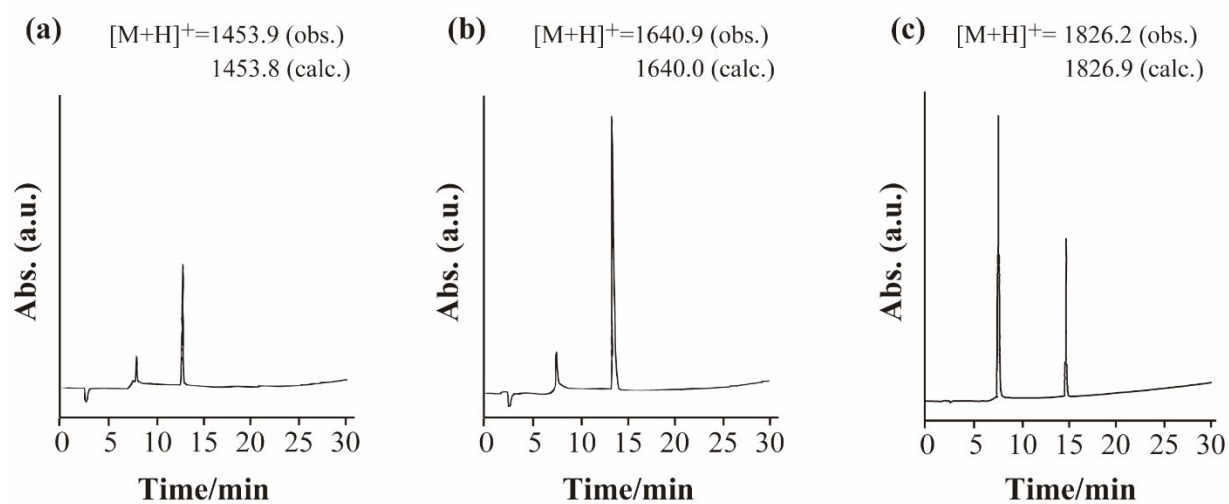

**Fig. S11** HPLC for purified (a) AuBP1, (b) 2W-AuBP1, and (c) 3W-AuBP1 separated on an ODS column (150 × 4.6 mm, 5 mm) with MilliQ water (containing 0.1% TFA) using a gradient from 0% to 100% acetonitrile (containing 0.08% TFA) over 30 min, 1.0 mL/min; detection at 220 nm.
